# Supplementary material for: Relationship between brachial-ankle and heart-femoral pulse wave velocities and the rapid decline of kidney function
Source: PubMed Central journal article supplement (PMC5770427; doi:10.1038/s41598-018-19334-w), 2018-01-16
Supplement: 41598_2018_19334_MOESM1_ESM.pdf [file 41598_2018_19334_MOESM1_ESM.pdf]

**Relationship between brachial-ankle and heart-femoral pulse wave velocities and the rapid decline of kidney function**

Sung Woo Lee<sup>1,2</sup>, Seung Hyeok Han<sup>3</sup>, Tae Hyun Yoo<sup>3</sup>, Wookyung Chung<sup>4</sup>, Sue K. Park<sup>5,6,7</sup>, Dong Wan Chae<sup>8</sup>, Curie Ahn<sup>8</sup>, and \*Kook-Hwan Oh<sup>8</sup>

<sup>1</sup>*Department of Internal Medicine, Seoul National University Postgraduate School, Seoul, Korea*

<sup>2</sup>*Department of Internal Medicine, Eulji University, Eulji General Hospital, Seoul, Korea*

<sup>3</sup>*Department of Internal Medicine, Yonsei University College of Medicine, Seoul, Korea*

<sup>4</sup>*Department of Internal Medicine, Gachon University, Gil Hospital, Incheon, Korea*

<sup>5</sup>*Department of Preventive Medicine, Seoul National University College of Medicine, Seoul, Korea*

<sup>6</sup>*Cancer Research Institute, Seoul National University, Seoul, Korea*

<sup>7</sup>*Department of Biomedical Science, Seoul National University Graduate School, Seoul, Korea*

<sup>8</sup>*Department of Internal Medicine, Seoul National University College of Medicine, Seoul, Korea*

**\*Correspondence to: Kook-Hwan Oh**

e-mail : ohchris@hanmail.net

Tel) 82-2-2072-0776

Fax) 82-2-741-4876

Address) Department of Internal Medicine, Seoul National University Hospital 101 *Daehak-ro, Chong No Gu* 03080, Seoul, Korea

**Figure S1. Flowchart of the patients' selection.** baPWV, brachial-ankle pulse wave velocity; eGFR, estimated glomerular filtration rate.

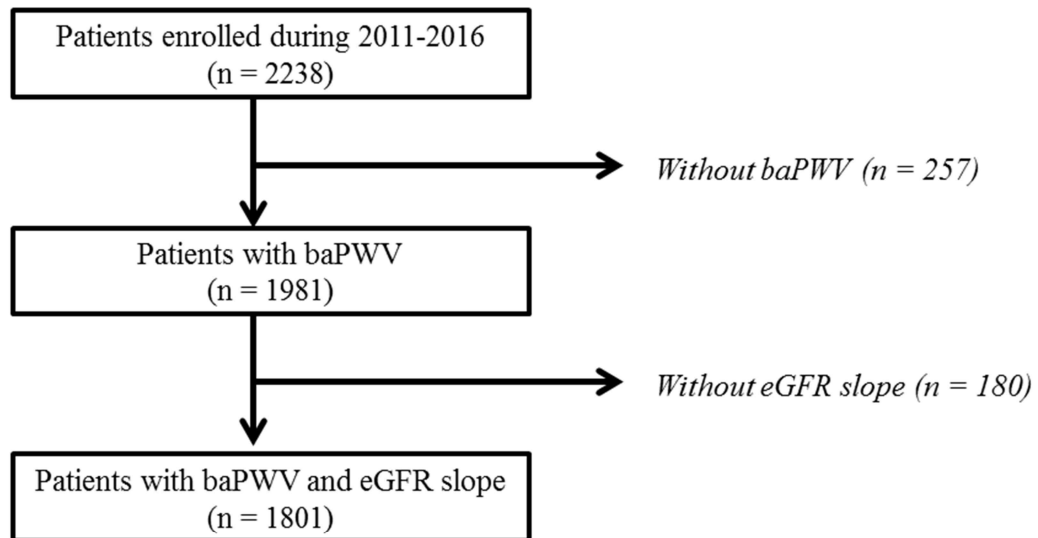

Table S1. Clinical characteristics of study population according to CKD stages

|                      | Stage 1 (n = 230) | Stage 2 (n = 350) | Stage 3 (n = 721) | Stage 4 (n = 405) | Stage 5 (n = 89) | <i>P</i> |
|----------------------|-------------------|-------------------|-------------------|-------------------|------------------|----------|
| Age (years)          | 44.1 ± 11.7       | 50.7 ± 11.6*      | 56.5 ± 11.2*      | 57.5 ± 10.9*      | 56.1 ± 11.8*     | <0.001   |
| Male sex (%)         | 47.8              | 66.1*             | 65.0*             | 59.2*             | 42.7             | 0.938    |
| Alcohol drinking (%) | 56.6              | 55.6              | 44.0*             | 34.5*             | 23.8*            | <0.001   |
| Smoking (Pack-year)  | 7.0 ± 15.0        | 10.7 ± 16.9       | 12.9 ± 18.8*      | 14.2 ± 20.7*      | 8.7 ± 17.2       | 0.001    |
| Hypertension (%)     | 89.6              | 95.2*             | 96.7*             | 97.3*             | 96.6*            | <0.001   |
| RAS inhibitor (%)    | 79.6              | 88.6*             | 88.5*             | 86.8*             | 86.5*            | 0.078    |
| Beta blocker (%)     | 14.3              | 17.1              | 25.9*             | 32.5*             | 31.5*            | <0.001   |
| CCB (%)              | 23.0              | 33.9*             | 45.5*             | 54.3*             | 60.7*            | <0.001   |
| Diuretics (%)        | 11.7              | 17.9*             | 32.3*             | 44.7*             | 51.7             | <0.001   |
| Diabetes (%)         | 11.5              | 13.5              | 28.9*             | 38.8*             | 37.1*            | <0.001   |
| CVD (%)              | 3.5               | 5.1               | 12.5*             | 14.7*             | 9.0*             | <0.001   |
| Cause of CKD         |                   |                   |                   |                   |                  |          |
| DMN (%)              | 7.0               | 13.1*             | 26.0*             | 39.6*             | 36.0*            | <0.001   |
| HN (%)               | 8.3               | 16.5*             | 24.2*             | 22.5*             | 15.7*            | <0.001   |
| GN (%)               | 45.7              | 36.8*             | 31.3*             | 24.2*             | 31.5*            | <0.001   |

|                                   |              |              |               |               |               |        |
|-----------------------------------|--------------|--------------|---------------|---------------|---------------|--------|
| Others (%)                        | 39.1         | 33.6         | 18.4*         | 13.7*         | 16.9*         | <0.001 |
| SBP (mm Hg)                       | 126.4 ± 14.4 | 127.1 ± 15.2 | 128.3 ± 15.9  | 130.4 ± 17.3* | 131.4 ± 19.1  | <0.001 |
| DBP (mm Hg)                       | 77.6 ± 10.4  | 77.8 ± 11.2  | 76.5 ± 10.6   | 76.6 ± 12.2   | 75.6 ± 10.7   | 0.050  |
| PP (mmHg)                         | 48.8 ± 10.5  | 49.3 ± 11.6  | 51.8 ± 13.1*  | 53.8 ± 13*    | 55.8 ± 15.2*  | <0.001 |
| HR (counts/min)                   | 73.4 ± 13.1  | 73.9 ± 13.0  | 72.8 ± 12.7   | 73.7 ± 13.0   | 71.8 ± 12.8   | 0.491  |
| baPWV (m/s)                       | 13.3 ± 2.0   | 14.4 ± 2.8*  | 15.6 ± 3.3*   | 16.4 ± 3.8*   | 16.0 ± 3.4*   | <0.001 |
| hfPWV (m/s)                       | 8.5 ± 1.5    | 9.4 ± 2.1*   | 10.4 ± 2.6*   | 11.0 ± 3.0*   | 10.8 ± 2.8*   | <0.001 |
| BMI (kg/m <sup>2</sup> )          | 24.1 ± 3.7   | 24.5 ± 3.4   | 24.7 ± 3.2*   | 24.5 ± 3.4*   | 24.3 ± 3.4    | 0.338  |
| FPG (mmol/l)                      | 5.7 ± 1.3    | 5.9 ± 1.7    | 6.3 ± 2.3     | 6.3 ± 2.5     | 6.4 ± 2.6     | <0.001 |
| BUN (mmol/l)                      | 4.8 ± 1.3    | 6.1 ± 1.8*   | 8.9 ± 2.8*    | 14.5 ± 4.4*   | 21 ± 6.4*     | <0.001 |
| Calcium (mmol/l)                  | 2.31 ± 0.11  | 2.32 ± 0.10  | 2.30 ± 0.12   | 2.24 ± 0.12*  | 2.15 ± 0.18*  | <0.001 |
| Phosphorus (mmol/l)               | 1.14 ± 0.17  | 1.12 ± 0.18  | 1.15 ± 0.18   | 1.26 ± 0.21*  | 1.47 ± 0.19*  | <0.001 |
| Cr (μmol/l)                       | 61.8 ± 12.3  | 88.7 ± 15.1* | 137.9 ± 28.5* | 236.5 ± 52.6* | 382.7 ± 75.4* | <0.001 |
| eGFR (ml/min/1.73m <sup>2</sup> ) | 110.1 ± 19.8 | 73.3 ± 8.6*  | 43.7 ± 8.7*   | 23.0 ± 4.4*   | 12.5 ± 1.7*   | <0.001 |
| Bilirubin (μmol/l)                | 14.6 ± 6.2   | 13.4 ± 5.5*  | 11.6 ± 4.6*   | 9.0 ± 3.4*    | 8.1 ± 2.8*    | <0.001 |

|                      |            |            |             |             |             |        |
|----------------------|------------|------------|-------------|-------------|-------------|--------|
| Albumin (g/l)        | 43.2 ± 3.9 | 43.0 ± 3.7 | 42.0 ± 4*   | 40.5 ± 4.4* | 40.5 ± 4.2* | <0.001 |
| Cholesterol (mmol/l) | 4.8 ± 1.0  | 4.7 ± 0.9  | 4.5 ± 1.0*  | 4.4 ± 1.1*  | 4.4 ± 1.0*  | <0.001 |
| Hemoglobin (g/dl)    | 14.0 ± 1.5 | 14.1 ± 1.7 | 13.0 ± 1.9* | 11.5 ± 1.5* | 10.5 ± 1.2* | <0.001 |
| Ln-hsCRP (nmol/l)    | 1.4 ± 1.3  | 1.8 ± 1.3* | 1.8 ± 1.4*  | 2.1 ± 1.4*  | 1.8 ± 1.3   | <0.001 |
| Ln-UPCR (g/g Cr)     | -1.5 ± 1.5 | -1.5 ± 1.5 | -0.8 ± 1.5* | -0.1 ± 1.3* | 0.1 ± 1.2*  | <0.001 |

RAS, renin angiotensin-aldosterone system; CCB, calcium channel blocker; CVD, cardiovascular disease; baPWV, brachial-ankle pulse wave velocity; CKD, chronic kidney disease; DMN, diabetic nephropathy; HN, hypertensive nephropathy; GN, glomerulonephritis; SBP, systolic blood pressure; DBP, diastolic blood pressure; PP, pulse pressure; hfPWV, heart-femoral pulse wave velocity; BMI, body mass index; FPG, fasting plasma glucose; BUN, blood urea nitrogen; Cr, creatinine; eGFR, estimated glomerular filtration rate; hsCRP, high sensitivity C-reactive protein; UPCR, urine protein-to-creatinine ratio.

Values are expressed as mean ± standard deviation for continuous variables and percentage for categorical variables. *P*-trend was analyzed by linear-term of one-way ANOVA for continuous variables and a linear-by-linear association for categorical variables. Except for hfPWV (619/1801, 34.4%) and smoking year (286/1801, 15.9%), missing rate of all above variables was below 8.9%.

\* meant *P* < 0.05 when compared to CKD stage 1 by using Bonferroni post-hoc analysis of one-way ANOVA for continuous variables and chi-square test for categorical variables.
